# Supplementary material
Source: PubMed Central journal article supplement (PMC4477797)
Supplement: NIHMS605322-supplement-Supp.pdf [file NIHMS605322-supplement-Supp.pdf]

Figure S1

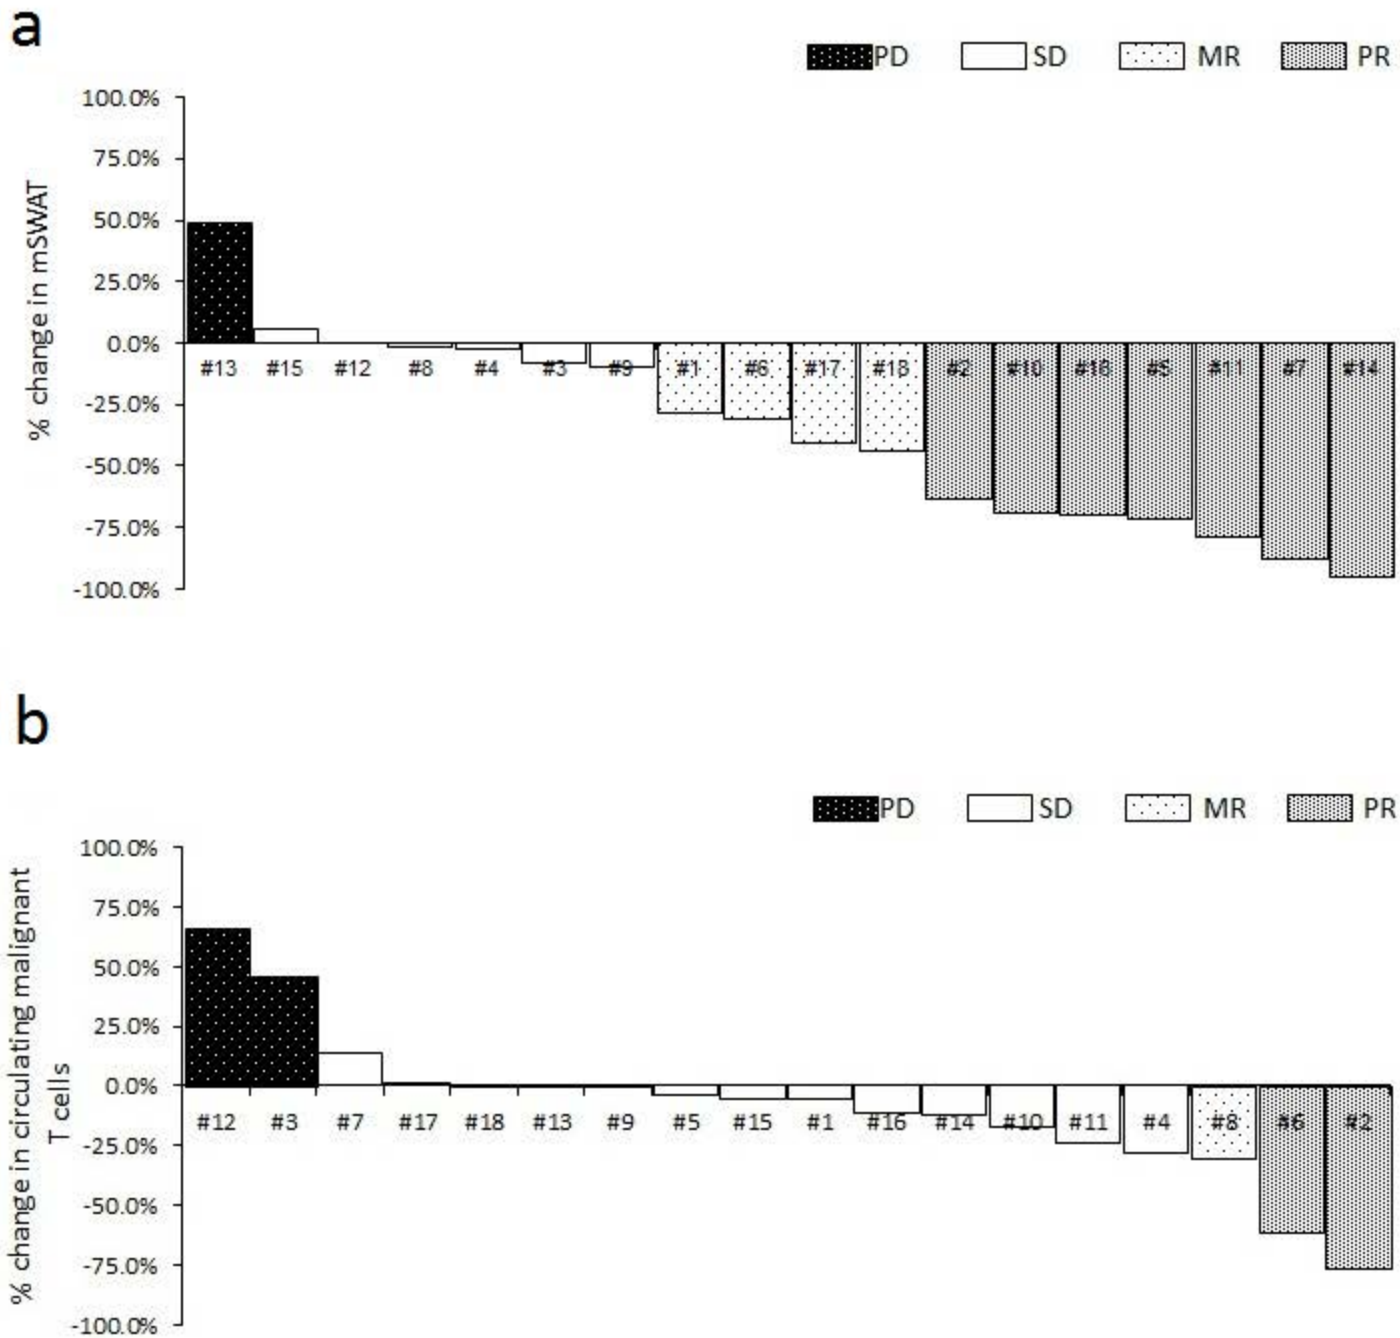

**Figure S1. Percentage changes from baseline to 6 months of ECP treatment in mSWAT and circulating malignant T cells in 18 L-CTCL patients.** The modified skin-weighted assessment tool (mSWAT) (a) and circulating malignant T cells by flow cytometry (b) were assessed for each patient at baseline to 6 months after ECP treatment. The percentage change at 6 months from baseline was calculated for each patient. PR: partial responders (#2, #5, #6, #7, #10, #11, #14, and #16); MR: minor responders (#1, #8, #17, and #18). SD: stable disease (#4, #9, and #15); PD: progressive disease (#3, #12, and #13).

**Table S1 Clinical characteristics of L-CTCL patients in this study**

| Patient # | Age/Gender/Race | Stage         | TCR v $\beta$ (%)        | mSWAT | Circulating tumor T cells* |           | ECP Cycles | Additional Therapy          | Response |       |         |
|-----------|-----------------|---------------|--------------------------|-------|----------------------------|-----------|------------|-----------------------------|----------|-------|---------|
|           |                 |               |                          |       | %                          | / $\mu$ l |            |                             | Skin     | Blood | Overall |
| 1         | 58/F/C          | IVA           | V $\beta$ (70.0)         | 63.0  | 64.2                       | 1751.0    | 7          | Bexarotene<br>IFN- $\alpha$ | MR       | SD    | MR      |
| 2         | 66/M/C          | IIIB          | V $\beta$ 22 (91.0)      | 100.0 | 82.2                       | 413.0     | 10         | Bexarotene<br>IFN- $\alpha$ | PR       | CR    | PR      |
| 3         | 71/M/AA         | IVB (HTLV-1+) | n/a                      | 100.0 | 55.5                       | 525.0     | 7          | Bexarotene<br>IFN- $\alpha$ | SD       | PD    | PD      |
| 4         | 54/M/C          | IVA           | V $\beta$ 17 (54.0)      | 39.0  | 20.6                       | 69.0      | 7          | -                           | SD       | SD    | SD      |
| 5         | 74/F/C          | IVB           | V $\beta$ (85.0)         | 93.0  | 89.9                       | 3928.0    | 11         | Bexarotene                  | PR       | SD    | PR      |
| 6         | 74/M/C          | IVAB          | V $\beta$ 8 (73.7)       | 74.0  | 73.7                       | 2218.0    | 7          | -                           | MR       | PR    | PR      |
| 7         | 67/M/C          | IVA           | V $\beta$ (83.0)         | 87.0  | 79.1                       | 1671.0    | 12         | Bexarotene                  | PR       | SD    | PR      |
| 8**       | 61/M/C          | IIIB          | V $\beta$ (76.0)         | 77.0  | 64.4                       | 227.0     | 25         | IFN- $\alpha$               | SD       | MR    | MR      |
| 9         | 66/F/C          | IVB           | V $\beta$ 2 (97.0)       | 100.0 | 93.8                       | 17981.0   | 13         | Bexarotene<br>IFN- $\alpha$ | SD       | SD    | SD      |
| 10        | 74/M/C          | IVA           | V $\beta$ 7.2 (93.0)     | 48.1  | 85.9                       | 2752.0    | 11         | -                           | PR       | SD    | PR      |
| 11        | 79/M/C          | IVB (BM+)     | V $\beta$ 13.6<br>(97.1) | 54.0  | 87.5                       | 11581.0   | 9          | Bexarotene                  | PR       | SD    | PR      |
| 12*       | 71/M/C          | IVA           | V $\beta$ 17 (94.0)      | 100.0 | 56.0                       | 1284.6    | 10         | Bexarotene<br>IFN- $\alpha$ | SD       | PD    | PD      |
| 13        | 78/F/AA         | IVB           | V $\beta$ 13.6<br>(95.0) | 47.0  | 94.5                       | 9977.0    | 10         | -                           | PD       | SD    | PD      |
| 14        | 63/M/C          | IVB (BM+)     | V $\beta$ (94.0)         | 49.0  | 94.7                       | 22751.0   | 10         | IFN- $\alpha$               | PR       | SD    | PR      |
| 15        | 73/M/C          | IVA           | V $\beta$ 18.0<br>(95.0) | 47.0  | 77.1                       | 2600.0    | 10         | Bexarotene                  | SD       | SD    | SD      |
| 16        | 67/F/C          | IVA           | n/a                      | 67.0  | 91.9                       | 4300.0    | 6          | Bexarotene                  | PR       | SD    | PR      |
| 17        | 63/M/C          | IVA           | V $\beta$ 5.1 (95.0)     | 5.0   | 91.7                       | 5139.0    | 6          | -                           | MR       | SD    | MR      |
| 18        | 61/M/C          | IVB           | V $\beta$ 7.1 (97.0)     | 87.0  | 91.7                       | 5500.0    | 8          | -                           | MR       | SD    | MR      |

M: male, F: female, C: Caucasian, AA: African American, mSWAT: modified severity weight assessment tool; ECP: extracorporeal photopheresis, n/a: not available; CR: complete response; PR: partial response, MR: minimal response, SD: stable disease, PD: progressive disease; HTLV-1: Human T Lymphotropic Virus-1, \*: CD4<sup>+</sup>CD26<sup>+</sup> T cells except Patient#12 with CD4<sup>+</sup> CD7<sup>-</sup> phenotype; \*\*: Patient with both L-CTCL and Graft-versus-Host disease (GVHD) who underwent weekly ECP treatment

**Table S2 Clinical characteristics of GVHD patients in this study**

| Patient # | Age/Sex/Race | Primary Disease                                | Type of Donor                       | Type of GVHD                            | Organs affected                                        | Concurrent therapies                                               | ECP cycles at 3/6 months | Clinical Response at 3 months                                                                           | Clinical response at 6 months                                                                                        |
|-----------|--------------|------------------------------------------------|-------------------------------------|-----------------------------------------|--------------------------------------------------------|--------------------------------------------------------------------|--------------------------|---------------------------------------------------------------------------------------------------------|----------------------------------------------------------------------------------------------------------------------|
| 1         | 60/F/C       | NHL                                            | Match unrelated                     | De novo chronic                         | Skin (sclerodermoid), Mouth                            | Tacrolimus<br>Methylprednisolone                                   | 7/12                     | No Response                                                                                             | GVHD progression                                                                                                     |
| 2         | 50/M/C       | NHL                                            | Match related sibling               | Acute, Grade 4 of skin                  | Skin                                                   | Steroids,<br>Mycophenolate,<br>Methylprednisolone                  | 5/n/a<br>stopped ECP     | Skin-Partial response                                                                                   | n/a                                                                                                                  |
| 3         | 29/M/C       | CLL                                            | Cord blood                          | Late acute                              | Skin (non-sclerodermoid), Gastrointestinal             | Mycophenolate,<br>Prednisone,<br>Tacrolimus                        | 14/25                    | No response                                                                                             | Partial response                                                                                                     |
| 4         | 52/M/C       | CML                                            | Match related transplant            | Classic chronic                         | Skin (sclerodermoid), eyes, liver, lung                | Steroids,<br>Erythromycin,<br>Prednisone                           | 9/25                     | Stable disease                                                                                          | Eye-no response<br>Skin-no response<br>Lungs-partial response<br>Liver-complete response<br>Overall-partial response |
| 5         | 62/M/C       | CLL                                            | Match unrelated                     | Classic Chronic                         | Skin(sclerodermoid), liver, oral, eyes                 | Tacrolimus                                                         | 19/43                    | Skin-Partial response<br>Liver-Complete response<br>Eye-no response<br>Mouth-partial response           | Skin - Partial response<br>Liver-Complete response<br>Eye -no response<br>Mouth-partial response                     |
| 6         | 55/F/C       | SLL                                            | Match Related Donor-from male donor | Classic chronic                         | Skin(sclerodermoid), joints- fascia, mouth, liver, eye | Tacrolimus,<br>Methylprednisolone                                  | 23/37                    | Skin-Progression<br>Eye-Progression<br>Liver-normal                                                     | Skin-minor response<br>fascia -Improved<br>Mouth-partial responses                                                   |
| 7         | 50/M/C       | CLL                                            | Match related donor                 | Overlap syndrome (both chronic & acute) | Skin (scleroderma), fascia, liver, mouth               | Mycophenolate ,<br>Methylprednisolone ,<br>Imatinib,<br>Tacrolimus | n/a                      | Skin-Partial response<br>Fascia-Partial response<br>Liver-Complete response<br>Mouth- Complete response | Skin-Partial response<br>Fascia-Partial response<br>Liver-Complete response<br>Mouth- Complete response              |
| 8         | 23/M/C       | Aplastic anemia                                | Match related                       | Late acute                              | Liver, skin-involved but not active                    | Methylprednisolone ,<br>Tacrolimus                                 | 14/n/a<br>stopped ECP    | No Response                                                                                             | No response-progression                                                                                              |
| 9         | 55/F/C       | AML                                            | Match related                       | Classic chronic                         | Skin, fascia, liver, Gastrointestinal tract (acute)    | Prednisone,<br>Tacrolimus,                                         | 11/35                    | No response                                                                                             | No response                                                                                                          |
| 10        | 52/M/C       | HL→ B cell lymphoma                            | HLA matched sibling                 | De novo chronic                         | skin (sclerodermoid), Mouth, eye, lung                 | Steroids,<br>Azithromycin                                          | 21/32                    | Stable disease ( Skin, Eyes, Lung, Mouth)                                                               | Stable disease (Eyes, Lung)<br>Partial response (Skin, Mouth)                                                        |
| 11        | 62/F/C       | Myelodysplastic syndrome / follicular lymphoma | Match-sibling                       | Overlap syndrome-both acute & chronic   | Skin (sclerodermoid, macular popular)                  | Tacrolimus,<br>Methyl prednisone                                   | 23/30                    | Stable Disease                                                                                          | Stable Disease                                                                                                       |

GVHD: Graft versus Host Disease, F: Female, M: Male, C: Caucasian, ECP: Extracorporeal Photopheresis, n/a: not available, HL: Hodgkin's Lymphoma, NHL: Non-Hodgkin's Lymphoma, AML: Acute myelogenous leukemia, CLL: Chronic lymphocytic leukemia, CML: Chronic myelogenous leukemia, SLL: Small Lymphocytic Lymphoma

**Table S3 The heterogeneity of levels, ratios, and HLA-DR expression on mDCs and pDCs in L-CTCL patients**

|                      | Percentages (%) |           | Ratio     |           | HLA-DR expression (MFI)† |                |
|----------------------|-----------------|-----------|-----------|-----------|--------------------------|----------------|
|                      | mDC             | pDC       | mDC/pDC   | pDC/mDC   | mDC                      | pDC            |
| <b>L-CTCL-High</b>   |                 |           |           |           |                          |                |
| No. of patients      | 1               | 1         | 3         | 3         | 0                        | 0              |
| Mean ± SD            | 1.33            | 2.12      | 3.04±0.58 | 2.68±0.18 | -                        | -              |
| <b>L-CTCL-Normal</b> |                 |           |           |           |                          |                |
| No. of patients      | 5               | 7         | 15        | 14        | 2                        | 9              |
| Mean ±SD             | 0.65±0.08       | 0.50±0.16 | 1.06±0.57 | 0.76±0.27 | 3851.68±9.19             | 2007.42±498.81 |
| <b>L-CTCL-Low</b>    |                 |           |           |           |                          |                |
| No. of patients      | 12              | 10        | 0         | 1         | 16                       | 9              |
| Mean ± SD            | 0.24±0.16       | 0.13±0.05 | -         | 0.27      | 1678.11±702.52           | 984.16±199.66  |

L-CTCL-High: L-CTCL patients with higher than normal levels; L-CTCL-Normal: L-CTCL patients with normal range levels; L-CTCL-Low: L-CTCL patients with lower than normal levels; †MFI: mean fluorescence intensity
